# Supplementary material for: Prediction of Pharmacokinetics of IDP-73152 in Humans Using Physiologically-Based Pharmacokinetics
Source: MDPI journal article supplement (doi:10.3390/pharmaceutics14061157), 2022-05-28
Supplement: s1 [file s1]

# Prediction of Pharmacokinetics of IDP-73152 in Humans using Physiologically Based Pharmacokinetics

Myongjae Lee<sup>1</sup>, Yoo-Seong Jeong<sup>1</sup>, Min-Soo Kim<sup>1</sup>, Kyung-Mi An<sup>2</sup>, Suk-Jae Chung<sup>1,3,\*</sup>

<sup>1</sup> College of Pharmacy, Seoul National University, Seoul 08826, Korea; myislet@snu.ac.kr (M.L.); jus2401@snu.ac.kr (Y.-S.J.); misol@snu.ac.kr (M.-S.K.)

<sup>2</sup> Ildong Pharmaceutical Co., Ltd., Hwaseong, Gyeonggi 18449, Korea; kman@ildong.com

<sup>3</sup> Research Institute of Pharmaceutical Sciences, Seoul National University, Seoul 08826, Korea;

\* Correspondence: sukje@snu.ac.kr

## Section S1: Physiological parameters

**Table S1.** Physiological variables [26–28]

| Parameter             |     | Mouse   | Rat     | Dog     | Human   |
|-----------------------|-----|---------|---------|---------|---------|
| Body weight (kg)      |     | 0.02    | 0.2     | 10      | 65      |
| Cardiac output (mL/s) |     | 0.192   | 1.10    | 34.2    | 90.05   |
| Lung                  | %CO | 100     | 100     | 100     | 100     |
|                       | FV  | 0.00634 | 0.00810 | 0.00867 | 0.0175  |
| Adipose               | %CO | 1.12    | 0.835   | 3.17    | 6.57    |
|                       | FV  | 0.0764  | 0.0386  | 0.164   | 0.274   |
| Muscle                | %CO | 13.4    | 15.7    | 22.6    | 12.6    |
|                       | FV  | 0.369   | 0.471   | 0.439   | 0.350   |
| Liver                 | %CO | 29.5    | 24.6    | 28.0    | 25.0    |
|                       | FV  | 0.0665  | 0.0787  | 0.0303  | 0.0226  |
| Spleen                | %CO | 1.32    | 1.25    | 2.26    | 3.15    |
|                       | FV  | 0.00403 | 0.00232 | 0.00247 | 0.00262 |
| Heart                 | %CO | 4.11    | 8.14    | 4.89    | 4.24    |
|                       | FV  | 0.00437 | 0.00463 | 0.00767 | 0.00483 |
| Brain                 | %CO | 6.69    | 2.72    | 4.70    | 14.1    |
|                       | FV  | 0.0167  | 0.00478 | 0.00763 | 0.0230  |
| Kidney                | %CO | 18.8    | 19.2    | 19.6    | 22.9    |
|                       | FV  | 0.0156  | 0.0143  | 0.00500 | 0.00516 |
| Skin                  |     | 8.89    | 12.1    | 12.5    | 5.82    |

|          |     |         |         |         |          |
|----------|-----|---------|---------|---------|----------|
|          | FV  | 0.141   | 0.154   | 0.0774  | 0.0403   |
| Testis   | %CO | 0.435   | 1.04    | 0.312   | 0.170    |
|          | FV  | 0.00592 | 0.00965 | 0.00164 | 0.000674 |
| Venous   | FV  | 0.0452  | 0.0216  | 0.0600  | 0.0637   |
| Arterial | FV  | 0.0228  | 0.0436  | 0.0300  | 0.0319   |

**Table S2.** Gastrointestinal transit rate constant [33,34]

| Parameter        | Mouse | Rat   | Dog   | Human  |
|------------------|-------|-------|-------|--------|
| Stomach emptying | 12.5  | 12.5  | 4.00  | 4.00   |
| Duodenum         | 0.667 | 5.26  | 3.57  | 4.00   |
| Jejunum          | 2.00  | 0.633 | 0.676 | 0.606  |
| Ileum            | 4.167 | 25.0  | 16.7  | 0.787  |
| Caecum           | 0.962 | 0.233 | 0.262 | 0.251  |
| Colon            | 0.130 | 0.130 | 0.122 | 0.0838 |

**Section S2: Deconvolution of the PK profiles**

An apparent absorption rate constant  $k_a$  (i.e., model-independent) at each sampling time can be calculated based on the area-function method [58]:

$$k_a = \frac{C_{po}(t)}{F \cdot AUC_{iv}^{0-t} - AUC_{po}^{0-t}}$$

where  $C_{po}(t)$  is the plasma concentration at time  $t$  after oral administration;  $F$  is the absolute bioavailability;  $AUC_{iv}^{0-t}$  and  $AUC_{po}^{0-t}$  is the AUC of intravenous and oral dose from time 0 to  $t$ .

The fraction of the amount absorbed at time  $t$  ( $F_a(t)$ ) and the drug input rate ( $dF_a(t)/dt$ ) can be expressed as:

$$F_a(t) = 1 - e^{-k_a t}$$

$$\frac{dF_a(t)}{dt} = k_a e^{-k_a t}$$

Following plots were obtained for the pharmacokinetics of IDP-73152 in mice, and rats (Figure S1).

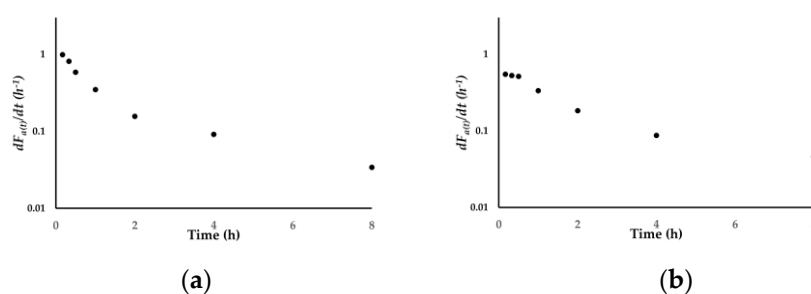**Figure S1.**  $dF_a(t)/dt$ , i.e., the input rate, versus time plots for (a) mice, and (b) rats

**Section S3: physicochemical properties****Table S3.** Physiological properties of IDP-73152

| Parameter                      | Value              |
|--------------------------------|--------------------|
| Hydrogen bond donor count      | 3                  |
| Hydrogen bond acceptor count   | 5                  |
| Topological polar surface area | 102 Å <sup>2</sup> |
| log <i>P</i>                   | -0.52              |
| p <i>K</i> <sub>a</sub>        | 8.8                |
